# Supplementary material for: Synthesis, structural characterization, and chemical properties of pentacoordinate model complexes for the active site of [Fe]-hydrogenase
Source: Royal Society of Chemistry journal article supplement (doi:10.1039/c6ra18628a), 2016-01-01
Supplement: c6ra18628a1.pdf [file c6ra18628a1.pdf]

# Synthesis, Structural Characterization, and Chemical Properties of Pentacoordinate Model Complexes for the Active Site of [Fe]- Hydrogenase

Shuang Jiang,<sup>a,b,c</sup> Tianyong Zhang,<sup>\*a,b,c</sup> Xia Zhang,<sup>a,b,c</sup> Guanghui Zhang,<sup>a,b,c</sup> Li Hai,<sup>a,b,c</sup> and Bin Li<sup>\*a,b,c</sup>

<sup>a</sup> School of Chemical Engineering and Technology, Tianjin Key Laboratory of Applied Catalysis Science and Technology, Tianjin University, Tianjin 300354, China

<sup>b</sup> Collaborative Innovation Center of Chemical Science and Engineering (Tianjin), Tianjin 300354, China

<sup>c</sup> Tianjin Engineering Research Center of Functional Fine Chemicals, Tianjin 300354, China

**Table S1** Crystallographic data for **2** and **3**

|                                          | <b>2</b>                                                                       | <b>3</b>                                                                       |
|------------------------------------------|--------------------------------------------------------------------------------|--------------------------------------------------------------------------------|
| Empirical formula                        | C <sub>30</sub> H <sub>36</sub> FeI <sub>2</sub> N <sub>2</sub> O <sub>3</sub> | C <sub>30</sub> H <sub>38</sub> FeI <sub>2</sub> N <sub>2</sub> O <sub>3</sub> |
| CCDC no.                                 | 1429929                                                                        | 1429930                                                                        |
| Formula weight                           | 782.26                                                                         | 784.27                                                                         |
| Space group                              | Cc                                                                             | P2(1)/n                                                                        |
| T (K)                                    | 110(2)                                                                         | 113(2)                                                                         |
| Wavelength (Å)                           | 0.71073                                                                        | 0.71073                                                                        |
| Crystal size (mm)                        | 0.20 × 0.10 × 0.10                                                             | 0.20 × 0.18 × 0.12                                                             |
| Crystal system                           | Monoclinic                                                                     | Orthorhombic                                                                   |
| <i>a</i> (Å)                             | 33.960(7)                                                                      | 18.490(4)                                                                      |
| <i>b</i> (Å)                             | 10.340(2)                                                                      | 10.356(2)                                                                      |
| <i>c</i> (Å)                             | 18.590(4)                                                                      | 33.072(7)                                                                      |
| $\alpha$ (°)                             | 90                                                                             | 90                                                                             |
| $\beta$ (°)                              | 98.22(3)                                                                       | 90                                                                             |
| $\gamma$ (°)                             | 90                                                                             | 90                                                                             |
| <i>V</i> (Å <sup>3</sup> )               | 6461(2)                                                                        | 6333(2)                                                                        |
| <i>Z</i>                                 | 8                                                                              | 8                                                                              |
| $\rho$ (g/cm <sup>3</sup> )              | 1.608                                                                          | 1.645                                                                          |
| $\theta$ range (°)                       | 1.21 -28.32                                                                    | 2.0607-27.8625                                                                 |
| $\mu$ (mm <sup>-1</sup> )                | 2.409                                                                          | 2.458                                                                          |
| <i>F</i> (000)                           | 3088.0                                                                         | 3104.0                                                                         |
| Tmin and Tmax                            | 0.644,0.795                                                                    | 0.639 and 0.757                                                                |
| Data/restraints/parameters               | 14872 / 2 / 701                                                                | 15063 /20/702                                                                  |
| goodness-of-fit on <i>F</i> <sup>2</sup> | 1.052                                                                          | 1.092                                                                          |
| <i>R</i> [ <i>I</i> ≥2 $\sigma$ ]        | 0.0537 wR2 = 0.1014                                                            | 0.0629 wR2 =0.1279                                                             |
| <i>R</i> (all data)                      | R1 = 0.0763 wR2 = 0.1091                                                       | 0.0915 wR2 =0.1463                                                             |

**Table S2** Crystallographic data for 5-8

|                                   | 5                                                                 | 6                                                                 | 7                                                                 | 8                                                                 |
|-----------------------------------|-------------------------------------------------------------------|-------------------------------------------------------------------|-------------------------------------------------------------------|-------------------------------------------------------------------|
| Empirical formula                 | C <sub>29</sub> H <sub>31</sub> FeN <sub>3</sub> O <sub>2</sub> S | C <sub>35</sub> H <sub>41</sub> FeN <sub>3</sub> O <sub>2</sub> S | C <sub>35</sub> H <sub>43</sub> FeN <sub>3</sub> O <sub>2</sub> S | C <sub>13</sub> H <sub>13</sub> FeN <sub>3</sub> O <sub>2</sub> S |
| CCDC no.                          | 1429932                                                           | 1429933                                                           | 1429934                                                           | 1429935                                                           |
| Formula weight                    | 541.48                                                            | 623.62                                                            | 625.63                                                            | 331.17                                                            |
| Space group                       | P2(1)/n                                                           | P-1                                                               | P-1                                                               | P-1                                                               |
| T (K)                             | 113                                                               | 113                                                               | 113                                                               | 113                                                               |
| Wavelength (Å)                    | 0.71073                                                           | 0.71073                                                           | 0.71073                                                           | 0.71073                                                           |
| Crystal size (mm)                 | 0.20 × 0.18 × 0.12                                                | 0.20 × 0.18 × 0.10                                                | 0.20 × 0.18 × 0.12                                                | 0.20 × 0.18 × 0.10                                                |
| Crystal system                    | Monoclinic                                                        | Triclinic                                                         | Triclinic                                                         | Triclinic                                                         |
| <i>a</i> (Å)                      | 10.308(2)                                                         | 11.478(2)                                                         | 11.416(2)                                                         | 7.6045(15)                                                        |
| <i>b</i> (Å)                      | 19.262(4)                                                         | 14.306(3)                                                         | 14.213(3)                                                         | 8.7041(17)                                                        |
| <i>c</i> (Å)                      | 13.340(3)                                                         | 20.809(4)                                                         | 20.749(4)                                                         | 22.191(4)                                                         |
| α (°)                             | 90                                                                | 82.76(3)                                                          | 82.99(3)                                                          | 89.29(3)                                                          |
| β (°)                             | 93.79(3)                                                          | 80.15(3)                                                          | 80.48(3)                                                          | 87.47(3)                                                          |
| γ (°)                             | 90                                                                | 76.45(3)                                                          | 76.34(3)                                                          | 71.63(3)                                                          |
| <i>V</i> (Å <sup>3</sup> )        | 2642.9(9)                                                         | 3259.6(11)                                                        | 3214.3(11)                                                        | 1392.6(5)                                                         |
| <i>Z</i>                          | 4                                                                 | 4                                                                 | 4                                                                 | 4                                                                 |
| ρ (g/cm <sup>3</sup> )            | 1.361                                                             | 1.271                                                             | 1.293                                                             | 1.580                                                             |
| θ range (°)                       | 1.5299-27.8824                                                    | 1.7008-27.8267                                                    | 1.4800-27.9745                                                    | 1.8372-28.0107                                                    |
| μ (mm <sup>-1</sup> )             | 1.361                                                             | 0.561                                                             | 0.569                                                             | 1.236                                                             |
| F(000)                            | 1136.0                                                            | 1320.0                                                            | 1328.0                                                            | 680.0                                                             |
| Tmin and Tmax                     | 0.876 and 0.923                                                   | 0.896 and 0.946                                                   | 0.895 and 0.935                                                   | 0.790 and 0.886                                                   |
| Data/restraints/parameters        | 6325/1/335                                                        | 11358/2/780                                                       | 15149/2/781                                                       | 6479/2/373                                                        |
| goodness-of-fit on F <sup>2</sup> | 1.021                                                             | 1.023                                                             | 1.031                                                             | 1.070                                                             |
| <i>R</i> [ ≥2σ]                   | 0.0462                                                            | 0.0935                                                            | 0.0509                                                            | 0.0572                                                            |
|                                   | wR2 = 0.0921                                                      | wR2 = 0.2409                                                      | wR2 = 0.0933                                                      | wR2 = 0.1550                                                      |
| <i>R</i> (all data)               | 0.0655                                                            | 0.1225                                                            | 0.0840                                                            | 0.0783                                                            |
|                                   | wR2 = 0.1002                                                      | wR2 = 0.2569                                                      | wR2 = 0.1050                                                      | wR2 = 0.1596                                                      |

**Table S3** Selected bond lengths and bond angles of complex 5

| Bond length (Å)   |           |                 |            |
|-------------------|-----------|-----------------|------------|
| Fe(1)-C(1)        | 1.768(2)  | Fe(1)-N(1)      | 1.8636(18) |
| Fe(1)-C(2)        | 1.777(2)  | Fe(1)-C(20)     | 1.954(2)   |
| Fe(1)-S(1)        | 2.2376(8) | C(20)-N(3)      | 1.341(3)   |
| Bond angles (deg) |           |                 |            |
| S(1)-Fe(1)-C(2)   | 172.24(7) | S(1)-Fe(1)-N(1) | 85.06(6)   |
| N(1)-Fe(1)-C(1)   | 140.15(9) | N(3)-C(20)-N(2) | 107.44(17) |
| C(1)-Fe(1)-C(20)  | 100.66(9) |                 |            |

**Table S4** Selected bond lengths and bond angles of complex 6

| Bond length (Å)   |            |                 |           |
|-------------------|------------|-----------------|-----------|
| Fe(1)-C(1)        | 1.737(7)   | Fe(1)-N(1)      | 1.865(5)  |
| Fe(1)-C(2)        | 1.774(7)   | Fe(1)-C(23)     | 1.957(6)  |
| Fe(1)-S(1)        | 2.2450(19) | C(23)-N(3)      | 1.379(7)  |
| Bond angles (deg) |            |                 |           |
| S(1)-Fe(1)-C(2)   | 168.9(2)   | S(1)-Fe(1)-N(1) | 84.44(17) |
| N(1)-Fe(1)-C(1)   | 142.9(3)   | N(3)-C(23)-N(2) | 103.3(5)  |
| C(1)-Fe(1)-C(23)  | 100.0(3)   |                 |           |

**Table S5** Selected bond lengths and bond angles of complex 7

| Bond length (Å)   |            |                 |            |
|-------------------|------------|-----------------|------------|
| Fe(1)-C(1)        | 1.763(2)   | Fe(1)-N(1)      | 1.864(2)   |
| Fe(1)-C(2)        | 1.766(3)   | Fe(1)-C(23)     | 1.951(2)   |
| Fe(1)-S(1)        | 2.2337(9)  | C(23)-N(3)      | 1.356(3)   |
| Bond angles (deg) |            |                 |            |
| S(1)-Fe(1)-C(1)   | 167.17(8)  | S(1)-Fe(1)-N(1) | 84.33(7)   |
| N(1)-Fe(1)-C(2)   | 143.03(10) | N(3)-C(23)-N(2) | 107.04(19) |
| C(2)-Fe(1)-C(23)  | 100.33(11) |                 |            |

**Table S6** Selected bond lengths and bond angles of complex **8**

| Bond length (Å)   |            |                  |            |
|-------------------|------------|------------------|------------|
| Fe(1)-C(1)        | 1.783(5)   | Fe(1)-N(1)       | 1.858(4)   |
| Fe(1)-C(2)        | 1.730(5)   | Fe(1)-C(12)      | 1.965(5)   |
| Fe(1)-S(1)        | 2.2259(15) | C(12)-N(3)       | 1.353(6)   |
| Bond angles (deg) |            |                  |            |
| S(1)-Fe(1)-C(2)   | 97.78(16)  | S(1)-Fe(1)-C(12) | 159.92(14) |
| N(1)-Fe(1)-C(1)   | 156.4(2)   | N(3)-C(12)-N(2)  | 103.3(4)   |
| C(1)-Fe(1)-C(12)  | 88.6(2)    |                  |            |

**Mathematic relations of theoretical calculations**

Free energy in gas phase= Electronic energy + Thermal correction to free

Free energy in solution phase= Free energy in gas phase + Solvation free energy

Variation of free energy in gas phase= Free energy in gas phase of **6-NH<sup>+</sup>/6-SH<sup>+</sup>/6-NH<sup>+</sup>-SH<sup>+</sup>/7-NH<sup>+</sup>/7-SH<sup>+</sup>/7-NH<sup>+</sup>-SH<sup>+</sup>** -

Free energy in gas phase of **6/7**

Variation of free energy in solution phase = Free energy in solution phase of **6-NH<sup>+</sup>/6-SH<sup>+</sup>/6-NH<sup>+</sup>-SH<sup>+</sup>/7-NH<sup>+</sup>/7-SH<sup>+</sup>/7-**

**NH<sup>+</sup>-SH<sup>+</sup>** - Free energy in solution phase of **6/7**

**Table S7** Computed energy values of complex **6**

|                                        | Electronic energy<br>(Hartree) | Thermal correction to free<br>energy (Hartree) | Free energy in gas<br>phase (Hartree) |
|----------------------------------------|--------------------------------|------------------------------------------------|---------------------------------------|
| <b>6</b>                               | -3336.026279                   | 0.59356                                        | -3335.432719                          |
| <b>6-NH<sup>+</sup></b>                | -3336.414831                   | 0.605493                                       | -3335.809338                          |
| <b>6-SH<sup>+</sup></b>                | -3336.396467                   | 0.603051                                       | -3335.793416                          |
| <b>6-NH<sup>+</sup>-SH<sup>+</sup></b> | -3336.662189                   | 0.615845                                       | -3336.046344                          |

| Solvation free energy<br>(Hartree) | Free energy in solution<br>phase (Hartree) | Variation of free energy in<br>gas phase (kJ/mol) | Variation of free<br>energy in solution<br>phase (kJ/mol) |
|------------------------------------|--------------------------------------------|---------------------------------------------------|-----------------------------------------------------------|
| -0.035780196                       | -3335.468499                               | 0.00                                              | 0.00                                                      |
| -0.088451696                       | -3335.89779                                | -962.51                                           | -40.30                                                    |
| -0.081103496                       | -3335.87452                                | -920.70                                           | 20.80                                                     |

-0.229925396

-3336.27627

-1558.45

52.81

**Table S8** Computed energy values of complex **7**

|                                        | Electronic energy<br>(Hartree) | Thermal correction to free<br>energy (Hartree) | Free energy in gas<br>phase (Hartree) |
|----------------------------------------|--------------------------------|------------------------------------------------|---------------------------------------|
| <b>7</b>                               | -3337.222589                   | 0.615906                                       | -3336.606683                          |
| <b>7-NH<sup>+</sup></b>                | -3337.611785                   | 0.629035                                       | -3336.98275                           |
| <b>7-SH<sup>+</sup></b>                | -3337.593128                   | 0.625094                                       | -3336.968034                          |
| <b>7-NH<sup>+</sup>-SH<sup>+</sup></b> | -3337.865006                   | 0.638905                                       | -3337.226101                          |

| Solvation free energy<br>(Hartree) | Free energy in solution<br>phase (Hartree) | Variation of free energy<br>in gas phase (kJ/mol) | Variation of free<br>energy in solution<br>phase (kJ/mol) |
|------------------------------------|--------------------------------------------|---------------------------------------------------|-----------------------------------------------------------|
| -0.036698896                       | -3336.643381                               | 0.00                                              | 0.00                                                      |
| -0.087929196                       | -3337.070679                               | -961.05                                           | -35.06                                                    |
| -0.081943496                       | -3337.049978                               | -922.42                                           | 19.29                                                     |
| -0.229139296                       | -3337.455241                               | -1573.66                                          | 42.08                                                     |

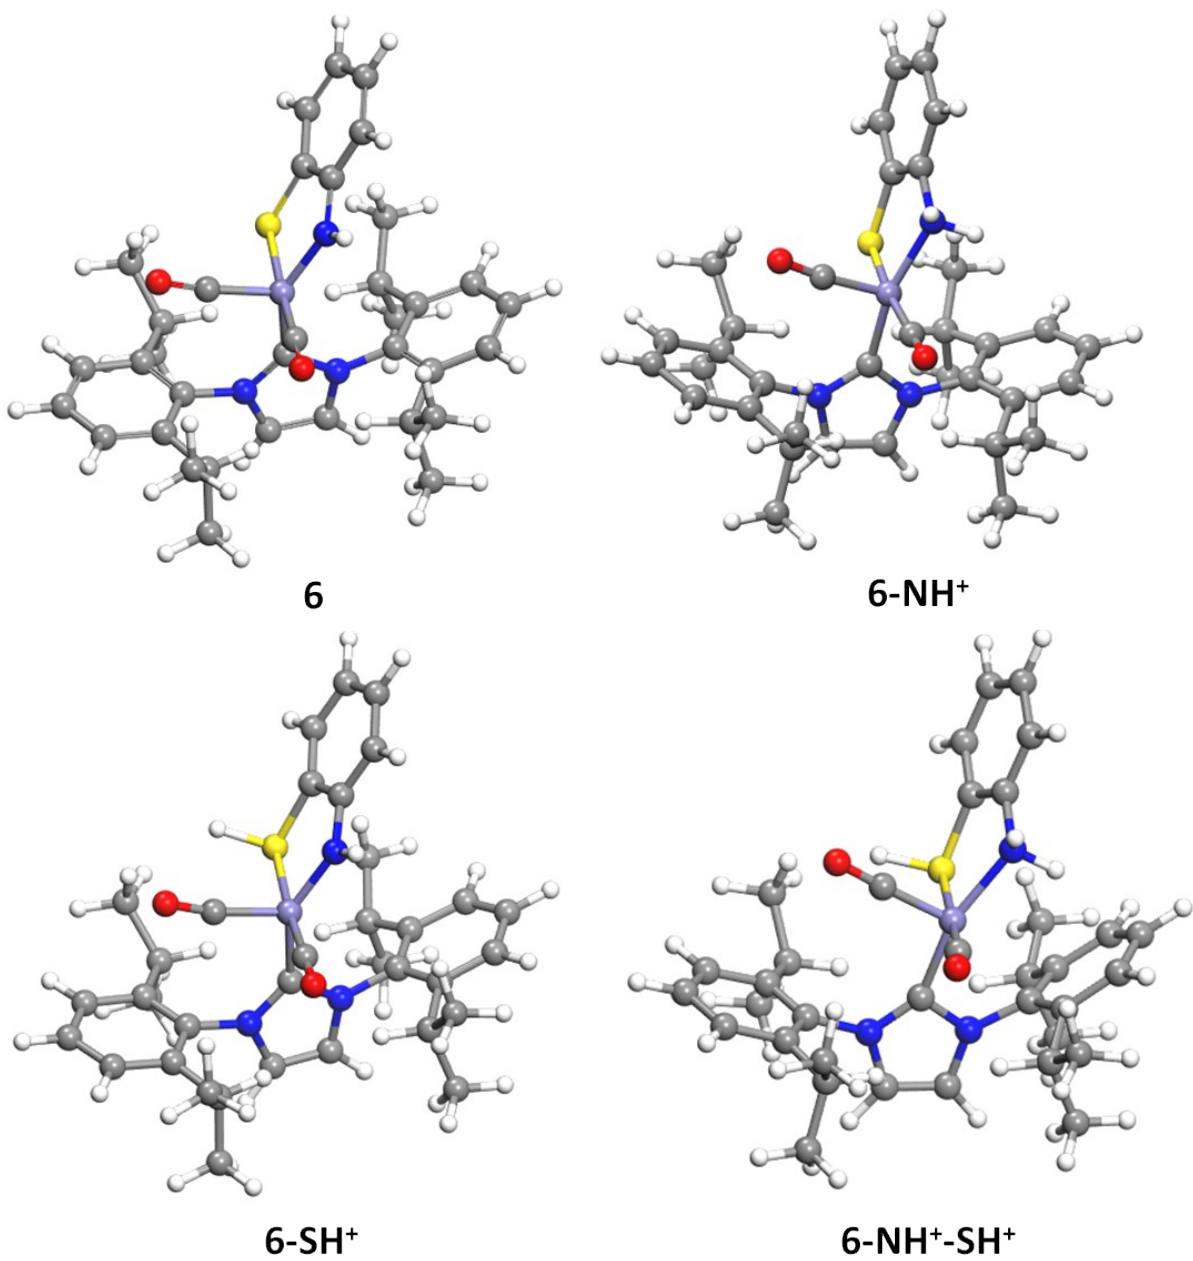

**Fig. S1** The optimized structures of complex **6** and corresponding protonated species **6-NH<sup>+</sup>**, **6-SH<sup>+</sup>** and **6-NH<sup>+</sup>-SH<sup>+</sup>**.

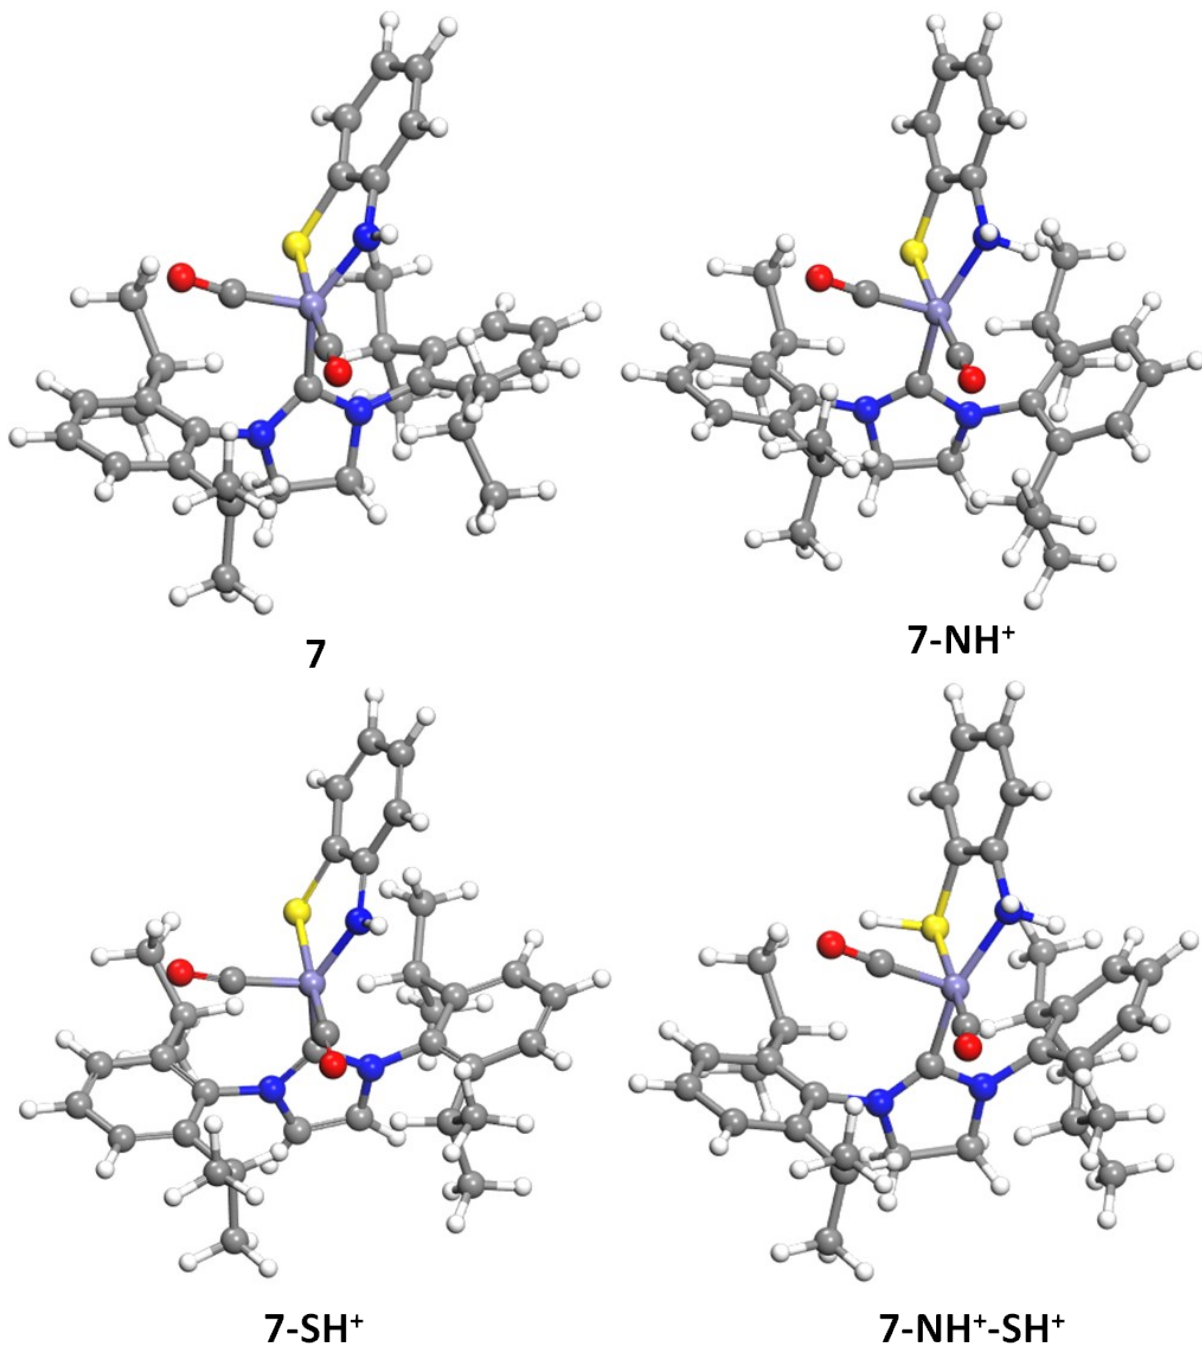

**Fig. S2** The optimized structures of complex **7** and corresponding protonated species **7-NH<sup>+</sup>**, **7-SH<sup>+</sup>** and **7-NH<sup>+</sup>-SH<sup>+</sup>**.

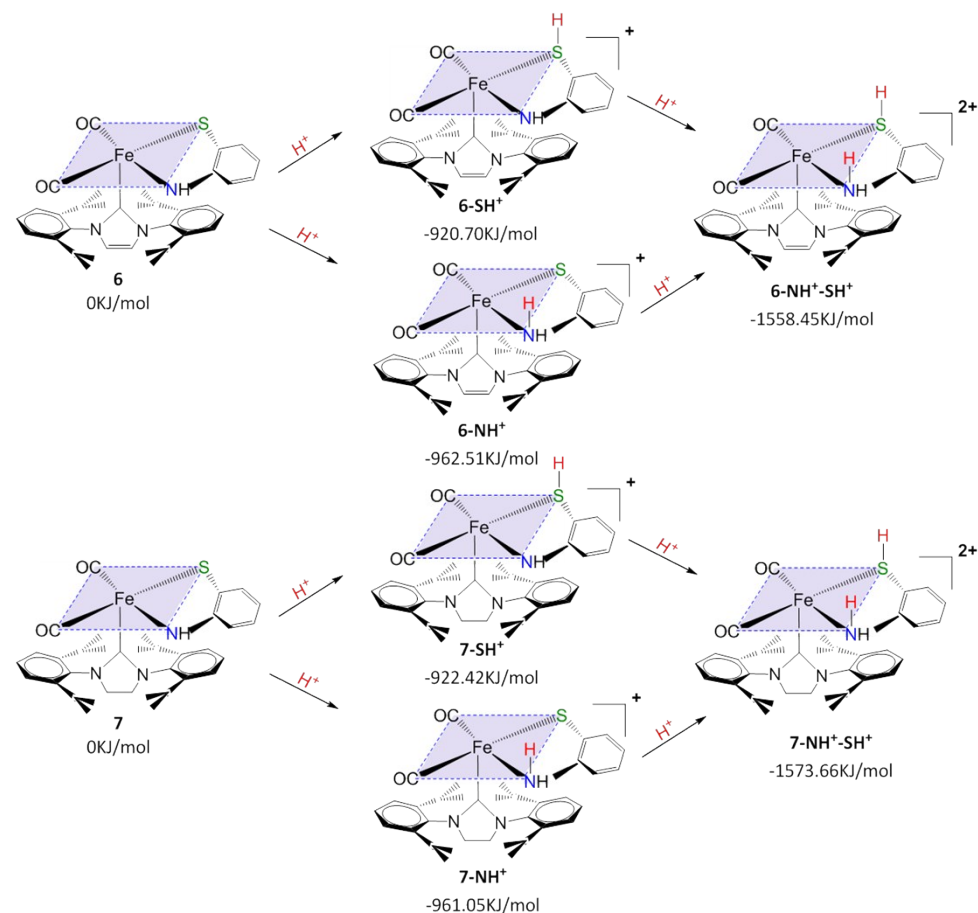

**Fig. S3** The free energy comparison between the possible protonated products in gas phase.

**Table S9** The atomic coordinate of optimized species of complex 6

| Tag | Atomic symbol | X      | Y      | Z      |
|-----|---------------|--------|--------|--------|
| 1   | Fe            | 0.251  | -0.392 | -1.253 |
| 2   | S             | 1.073  | -2.082 | 0.041  |
| 3   | O             | -1.769 | -2.235 | -2.214 |
| 4   | O             | -0.630 | 1.690  | -3.103 |
| 5   | N             | 1.857  | -0.551 | -2.172 |
| 6   | H             | 2.066  | -0.008 | -3.018 |
| 7   | N             | -1.800 | 0.321  | 0.902  |
| 8   | N             | 0.116  | 1.312  | 1.174  |
| 9   | C             | -1.015 | -1.471 | -1.737 |
| 10  | C             | -0.275 | 0.887  | -2.319 |
| 11  | C             | 2.550  | -2.395 | -0.838 |
| 12  | C             | 3.466  | -3.426 | -0.531 |



---

|    |   |        |        |        |
|----|---|--------|--------|--------|
| 13 | H | 3.256  | -4.100 | 0.307  |
| 14 | C | 4.627  | -3.577 | -1.295 |
| 15 | H | 5.339  | -4.374 | -1.052 |
| 16 | C | 4.885  | -2.711 | -2.385 |
| 17 | H | 5.795  | -2.841 | -2.981 |
| 18 | C | 3.985  | -1.698 | -2.711 |
| 19 | H | 4.178  | -1.028 | -3.559 |
| 20 | C | 2.804  | -1.520 | -1.939 |
| 21 | C | -2.696 | -2.300 | 3.404  |
| 22 | H | -2.877 | -1.251 | 3.702  |
| 23 | H | -1.982 | -2.740 | 4.124  |
| 24 | H | -3.652 | -2.846 | 3.496  |
| 25 | C | -2.140 | -2.401 | 1.963  |
| 26 | H | -1.194 | -1.831 | 1.924  |
| 27 | C | -1.802 | -3.866 | 1.613  |
| 28 | H | -2.676 | -4.532 | 1.738  |
| 29 | H | -1.008 | -4.236 | 2.285  |
| 30 | H | -1.438 | -3.957 | 0.576  |
| 31 | C | -3.113 | -1.769 | 0.967  |
| 32 | C | -4.268 | -2.471 | 0.571  |
| 33 | H | -4.439 | -3.481 | 0.958  |
| 34 | C | -5.197 | -1.904 | -0.308 |
| 35 | H | -6.087 | -2.471 | -0.605 |
| 36 | C | -4.991 | -0.614 | -0.811 |
| 37 | H | -5.726 | -0.178 | -1.497 |
| 38 | C | -3.857 | 0.138  | -0.450 |
| 39 | C | -2.929 | -0.466 | 0.437  |
| 40 | C | -3.688 | 1.566  | -0.971 |
| 41 | H | -2.634 | 1.860  | -0.821 |
| 42 | C | -3.991 | 1.690  | -2.480 |
| 43 | H | -3.405 | 0.968  | -3.073 |
| 44 | H | -3.735 | 2.705  | -2.831 |
| 45 | H | -5.061 | 1.526  | -2.699 |
| 46 | C | -4.570 | 2.548  | -0.161 |
| 47 | H | -5.639 | 2.286  | -0.258 |
| 48 | H | -4.437 | 3.581  | -0.531 |
| 49 | H | -4.315 | 2.534  | 0.913  |
| 50 | C | -1.915 | 1.119  | 2.044  |
| 51 | H | -2.836 | 1.160  | 2.619  |
| 52 | C | -0.714 | 1.741  | 2.213  |
| 53 | H | -0.366 | 2.442  | 2.967  |

---

|    |   |        |        |        |
|----|---|--------|--------|--------|
| 54 | C | -0.541 | 0.419  | 0.336  |
| 55 | C | 1.480  | 1.801  | 1.045  |
| 56 | C | 2.507  | 1.179  | 1.804  |
| 57 | C | 3.808  | 1.707  | 1.688  |
| 58 | H | 4.623  | 1.243  | 2.251  |
| 59 | C | 4.076  | 2.812  | 0.873  |
| 60 | H | 5.098  | 3.201  | 0.796  |
| 61 | C | 3.037  | 3.432  | 0.170  |
| 62 | H | 3.252  | 4.312  | -0.445 |
| 63 | C | 1.715  | 2.951  | 0.245  |
| 64 | C | 0.585  | 3.717  | -0.445 |
| 65 | H | -0.254 | 3.017  | -0.604 |
| 66 | C | 0.982  | 4.283  | -1.824 |
| 67 | H | 1.709  | 5.110  | -1.736 |
| 68 | H | 0.089  | 4.686  | -2.334 |
| 69 | H | 1.420  | 3.506  | -2.473 |
| 70 | C | 0.076  | 4.858  | 0.471  |
| 71 | H | -0.296 | 4.473  | 1.436  |
| 72 | H | -0.751 | 5.406  | -0.018 |
| 73 | H | 0.885  | 5.580  | 0.683  |
| 74 | C | 2.239  | 0.034  | 2.782  |
| 75 | H | 1.291  | -0.448 | 2.487  |
| 76 | C | 3.330  | -1.057 | 2.752  |
| 77 | H | 3.506  | -1.424 | 1.728  |
| 78 | H | 3.013  | -1.914 | 3.373  |
| 79 | H | 4.289  | -0.695 | 3.165  |
| 80 | C | 2.080  | 0.581  | 4.222  |
| 81 | H | 3.006  | 1.084  | 4.556  |
| 82 | H | 1.870  | -0.246 | 4.925  |
| 83 | H | 1.255  | 1.311  | 4.302  |

**Table S10** The atomic coordinate of optimized species of complex **6-NH<sup>+</sup>**

| Tag | Atomic symbol | X      | Y      | Z      |
|-----|---------------|--------|--------|--------|
| 1   | Fe            | 0.419  | -0.409 | -1.079 |
| 2   | S             | 1.339  | -1.652 | 0.481  |
| 3   | O             | -1.453 | -2.468 | -1.845 |
| 4   | O             | -0.563 | 1.356  | -3.218 |
| 5   | N             | 1.913  | -1.088 | -2.289 |
| 6   | H             | 1.646  | -1.183 | -3.280 |
| 7   | N             | -1.772 | 0.436  | 0.884  |

---

|    |   |        |        |        |
|----|---|--------|--------|--------|
| 8  | N | 0.031  | 1.657  | 0.979  |
| 9  | C | -0.753 | -1.603 | -1.496 |
| 10 | C | -0.162 | 0.712  | -2.331 |
| 11 | C | 2.475  | -2.615 | -0.484 |
| 12 | C | 3.185  | -3.715 | 0.043  |
| 13 | H | 3.062  | -3.987 | 1.096  |
| 14 | C | 4.018  | -4.464 | -0.799 |
| 15 | H | 4.559  | -5.325 | -0.394 |
| 16 | C | 4.150  | -4.132 | -2.161 |
| 17 | H | 4.791  | -4.732 | -2.814 |
| 18 | C | 3.460  | -3.029 | -2.689 |
| 19 | H | 3.568  | -2.758 | -3.746 |
| 20 | C | 2.640  | -2.276 | -1.840 |
| 21 | C | -2.575 | -1.790 | 3.809  |
| 22 | H | -2.925 | -0.746 | 3.896  |
| 23 | H | -1.878 | -1.987 | 4.642  |
| 24 | H | -3.453 | -2.449 | 3.937  |
| 25 | C | -1.881 | -2.058 | 2.450  |
| 26 | H | -1.018 | -1.372 | 2.372  |
| 27 | C | -1.327 | -3.499 | 2.404  |
| 28 | H | -2.116 | -4.249 | 2.592  |
| 29 | H | -0.561 | -3.630 | 3.188  |
| 30 | H | -0.863 | -3.725 | 1.430  |
| 31 | C | -2.837 | -1.756 | 1.296  |
| 32 | C | -3.863 | -2.666 | 0.976  |
| 33 | H | -3.933 | -3.607 | 1.531  |
| 34 | C | -4.796 | -2.388 | -0.030 |
| 35 | H | -5.585 | -3.113 | -0.259 |
| 36 | C | -4.735 | -1.179 | -0.733 |
| 37 | H | -5.482 | -0.965 | -1.504 |
| 38 | C | -3.735 | -0.225 | -0.461 |
| 39 | C | -2.787 | -0.552 | 0.544  |
| 40 | C | -3.742 | 1.119  | -1.191 |
| 41 | H | -2.753 | 1.592  | -1.051 |
| 42 | C | -3.978 | 0.975  | -2.711 |
| 43 | H | -3.275 | 0.260  | -3.171 |
| 44 | H | -3.848 | 1.953  | -3.207 |
| 45 | H | -5.003 | 0.631  | -2.936 |
| 46 | C | -4.800 | 2.063  | -0.568 |
| 47 | H | -5.814 | 1.636  | -0.669 |
| 48 | H | -4.791 | 3.043  | -1.078 |

---

|    |   |        |        |        |
|----|---|--------|--------|--------|
| 49 | H | -4.614 | 2.236  | 0.506  |
| 50 | C | -1.987 | 1.407  | 1.865  |
| 51 | H | -2.920 | 1.454  | 2.420  |
| 52 | C | -0.857 | 2.172  | 1.925  |
| 53 | H | -0.599 | 3.025  | 2.546  |
| 54 | C | -0.525 | 0.576  | 0.328  |
| 55 | C | 1.357  | 2.210  | 0.728  |
| 56 | C | 2.440  | 1.789  | 1.549  |
| 57 | C | 3.710  | 2.326  | 1.261  |
| 58 | H | 4.569  | 2.021  | 1.868  |
| 59 | C | 3.894  | 3.252  | 0.228  |
| 60 | H | 4.893  | 3.652  | 0.023  |
| 61 | C | 2.797  | 3.699  | -0.519 |
| 62 | H | 2.946  | 4.461  | -1.290 |
| 63 | C | 1.498  | 3.210  | -0.276 |
| 64 | C | 0.299  | 3.848  | -0.982 |
| 65 | H | -0.523 | 3.109  | -1.012 |
| 66 | C | 0.593  | 4.290  | -2.432 |
| 67 | H | 1.264  | 5.167  | -2.461 |
| 68 | H | -0.346 | 4.588  | -2.929 |
| 69 | H | 1.055  | 3.488  | -3.032 |
| 70 | C | -0.203 | 5.066  | -0.163 |
| 71 | H | -0.505 | 4.783  | 0.860  |
| 72 | H | -1.076 | 5.527  | -0.659 |
| 73 | H | 0.588  | 5.832  | -0.082 |
| 74 | C | 2.258  | 0.881  | 2.767  |
| 75 | H | 1.328  | 0.299  | 2.629  |
| 76 | C | 3.411  | -0.127 | 2.964  |
| 77 | H | 3.606  | -0.712 | 2.049  |
| 78 | H | 3.152  | -0.831 | 3.774  |
| 79 | H | 4.350  | 0.373  | 3.260  |
| 80 | C | 2.093  | 1.742  | 4.047  |
| 81 | H | 2.998  | 2.347  | 4.230  |
| 82 | H | 1.933  | 1.092  | 4.926  |
| 83 | H | 1.236  | 2.435  | 3.977  |
| 84 | H | 2.546  | -0.266 | -2.247 |

**Table S11** The atomic coordinate of optimized species of complex **6-SH<sup>+</sup>**

| Tag | Atomic symbol | X | Y | Z |
|-----|---------------|---|---|---|
|-----|---------------|---|---|---|

---

|    |    |        |        |        |
|----|----|--------|--------|--------|
| 1  | Fe | 0.264  | -0.390 | -1.229 |
| 2  | S  | 1.284  | -2.031 | 0.092  |
| 3  | O  | -1.736 | -2.267 | -2.174 |
| 4  | O  | -0.798 | 1.661  | -3.005 |
| 5  | N  | 1.842  | -0.457 | -2.164 |
| 6  | H  | 2.009  | 0.117  | -2.999 |
| 7  | N  | -1.879 | 0.366  | 0.842  |
| 8  | N  | 0.053  | 1.314  | 1.180  |
| 9  | C  | -1.021 | -1.480 | -1.690 |
| 10 | C  | -0.367 | 0.871  | -2.265 |
| 11 | C  | 2.757  | -2.290 | -0.905 |
| 12 | C  | 3.734  | -3.256 | -0.638 |
| 13 | H  | 3.617  | -3.954 | 0.197  |
| 14 | C  | 4.869  | -3.311 | -1.466 |
| 15 | H  | 5.640  | -4.064 | -1.277 |
| 16 | C  | 5.016  | -2.396 | -2.526 |
| 17 | H  | 5.906  | -2.441 | -3.162 |
| 18 | C  | 4.039  | -1.427 | -2.782 |
| 19 | H  | 4.159  | -0.720 | -3.610 |
| 20 | C  | 2.880  | -1.364 | -1.970 |
| 21 | C  | -2.695 | -2.257 | 3.334  |
| 22 | H  | -2.890 | -1.208 | 3.618  |
| 23 | H  | -1.976 | -2.679 | 4.059  |
| 24 | H  | -3.644 | -2.814 | 3.431  |
| 25 | C  | -2.142 | -2.366 | 1.892  |
| 26 | H  | -1.207 | -1.774 | 1.852  |
| 27 | C  | -1.782 | -3.833 | 1.568  |
| 28 | H  | -2.632 | -4.514 | 1.750  |
| 29 | H  | -0.954 | -4.174 | 2.215  |
| 30 | H  | -1.485 | -3.963 | 0.511  |
| 31 | C  | -3.126 | -1.764 | 0.888  |
| 32 | C  | -4.251 | -2.504 | 0.477  |
| 33 | H  | -4.393 | -3.522 | 0.855  |
| 34 | C  | -5.196 | -1.960 | -0.401 |
| 35 | H  | -6.064 | -2.554 | -0.706 |
| 36 | C  | -5.039 | -0.656 | -0.884 |
| 37 | H  | -5.791 | -0.240 | -1.562 |
| 38 | C  | -3.936 | 0.137  | -0.510 |
| 39 | C  | -2.988 | -0.450 | 0.368  |
| 40 | C  | -3.833 | 1.580  | -1.005 |
| 41 | H  | -2.794 | 1.925  | -0.844 |

---

---

|    |   |        |        |        |
|----|---|--------|--------|--------|
| 42 | C | -4.142 | 1.718  | -2.512 |
| 43 | H | -3.539 | 1.026  | -3.124 |
| 44 | H | -3.926 | 2.748  | -2.847 |
| 45 | H | -5.207 | 1.523  | -2.731 |
| 46 | C | -4.765 | 2.505  | -0.183 |
| 47 | H | -5.819 | 2.193  | -0.291 |
| 48 | H | -4.681 | 3.548  | -0.536 |
| 49 | H | -4.519 | 2.489  | 0.894  |
| 50 | C | -2.021 | 1.194  | 1.958  |
| 51 | H | -2.964 | 1.272  | 2.491  |
| 52 | C | -0.812 | 1.793  | 2.166  |
| 53 | H | -0.483 | 2.510  | 2.913  |
| 54 | C | -0.596 | 0.427  | 0.344  |
| 55 | C | 1.449  | 1.726  | 1.099  |
| 56 | C | 2.402  | 1.071  | 1.928  |
| 57 | C | 3.740  | 1.504  | 1.834  |
| 58 | H | 4.503  | 1.019  | 2.451  |
| 59 | C | 4.109  | 2.552  | 0.983  |
| 60 | H | 5.155  | 2.871  | 0.931  |
| 61 | C | 3.138  | 3.216  | 0.224  |
| 62 | H | 3.432  | 4.060  | -0.407 |
| 63 | C | 1.784  | 2.830  | 0.270  |
| 64 | C | 0.732  | 3.657  | -0.471 |
| 65 | H | -0.172 | 3.034  | -0.597 |
| 66 | C | 1.188  | 4.113  | -1.873 |
| 67 | H | 1.979  | 4.882  | -1.816 |
| 68 | H | 0.340  | 4.561  | -2.418 |
| 69 | H | 1.577  | 3.274  | -2.475 |
| 70 | C | 0.327  | 4.887  | 0.382  |
| 71 | H | -0.078 | 4.590  | 1.366  |
| 72 | H | -0.446 | 5.479  | -0.139 |
| 73 | H | 1.198  | 5.543  | 0.560  |
| 74 | C | 2.020  | 0.013  | 2.968  |
| 75 | H | 1.061  | -0.445 | 2.658  |
| 76 | C | 3.061  | -1.119 | 3.104  |
| 77 | H | 3.338  | -1.552 | 2.128  |
| 78 | H | 2.655  | -1.926 | 3.738  |
| 79 | H | 3.988  | -0.765 | 3.590  |
| 80 | C | 1.802  | 0.676  | 4.352  |
| 81 | H | 2.731  | 1.161  | 4.701  |
| 82 | H | 1.512  | -0.083 | 5.101  |

---

|    |   |       |        |        |
|----|---|-------|--------|--------|
| 83 | H | 1.012 | 1.446  | 4.328  |
| 84 | H | 0.607 | -3.174 | -0.231 |

**Table S12** The atomic coordinate of optimized species of complex **6-NH<sup>+</sup>-SH<sup>+</sup>**

| Tag | Atomic symbol | X      | Y      | Z      |
|-----|---------------|--------|--------|--------|
| 1   | Fe            | 0.545  | -0.031 | -0.907 |
| 2   | S             | 1.523  | -1.642 | 0.504  |
| 3   | O             | -0.835 | -2.206 | -2.238 |
| 4   | O             | -0.671 | 1.661  | -2.958 |
| 5   | N             | 2.344  | -0.133 | -1.869 |
| 6   | H             | 2.268  | 0.077  | -2.875 |
| 7   | N             | -2.028 | 0.178  | 0.878  |
| 8   | N             | -0.250 | 1.388  | 1.253  |
| 9   | C             | -0.302 | -1.336 | -1.686 |
| 10  | C             | -0.174 | 1.061  | -2.098 |
| 11  | C             | 2.852  | -2.184 | -0.596 |
| 12  | C             | 3.606  | -3.342 | -0.344 |
| 13  | H             | 3.388  | -3.976 | 0.522  |
| 14  | C             | 4.633  | -3.686 | -1.237 |
| 15  | H             | 5.213  | -4.598 | -1.064 |
| 16  | C             | 4.912  | -2.872 | -2.348 |
| 17  | H             | 5.711  | -3.147 | -3.043 |
| 18  | C             | 4.173  | -1.700 | -2.577 |
| 19  | H             | 4.399  | -1.062 | -3.439 |
| 20  | C             | 3.140  | -1.356 | -1.692 |
| 21  | C             | -2.749 | -2.746 | 3.215  |
| 22  | H             | -3.197 | -1.791 | 3.538  |
| 23  | H             | -2.050 | -3.081 | 4.001  |
| 24  | H             | -3.563 | -3.489 | 3.146  |
| 25  | C             | -2.019 | -2.604 | 1.857  |
| 26  | H             | -1.221 | -1.846 | 1.995  |
| 27  | C             | -1.340 | -3.939 | 1.475  |
| 28  | H             | -2.059 | -4.777 | 1.456  |
| 29  | H             | -0.562 | -4.204 | 2.213  |
| 30  | H             | -0.886 | -3.907 | 0.462  |
| 31  | C             | -2.977 | -2.103 | 0.775  |
| 32  | C             | -3.943 | -2.974 | 0.236  |
| 33  | H             | -3.975 | -4.016 | 0.570  |
| 34  | C             | -4.876 | -2.528 | -0.709 |
| 35  | H             | -5.621 | -3.223 | -1.109 |
| 36  | C             | -4.870 | -1.193 | -1.132 |

---

|    |   |        |        |        |
|----|---|--------|--------|--------|
| 37 | H | -5.616 | -0.858 | -1.859 |
| 38 | C | -3.931 | -0.269 | -0.633 |
| 39 | C | -2.990 | -0.762 | 0.309  |
| 40 | C | -4.003 | 1.199  | -1.059 |
| 41 | H | -3.053 | 1.691  | -0.769 |
| 42 | C | -4.168 | 1.371  | -2.586 |
| 43 | H | -3.399 | 0.818  | -3.153 |
| 44 | H | -4.095 | 2.439  | -2.855 |
| 45 | H | -5.155 | 1.020  | -2.932 |
| 46 | C | -5.149 | 1.923  | -0.309 |
| 47 | H | -6.126 | 1.474  | -0.560 |
| 48 | H | -5.183 | 2.989  | -0.597 |
| 49 | H | -5.029 | 1.868  | 0.787  |
| 50 | C | -2.283 | 0.972  | 2.005  |
| 51 | H | -3.235 | 0.917  | 2.528  |
| 52 | C | -1.171 | 1.736  | 2.245  |
| 53 | H | -0.967 | 2.474  | 3.017  |
| 54 | C | -0.773 | 0.435  | 0.425  |
| 55 | C | 1.105  | 1.823  | 0.922  |
| 56 | C | 2.218  | 1.309  | 1.675  |
| 57 | C | 3.502  | 1.623  | 1.194  |
| 58 | H | 4.379  | 1.231  | 1.717  |
| 59 | C | 3.685  | 2.470  | 0.084  |
| 60 | H | 4.700  | 2.706  | -0.255 |
| 61 | C | 2.586  | 3.094  | -0.527 |
| 62 | H | 2.754  | 3.842  | -1.307 |
| 63 | C | 1.266  | 2.836  | -0.092 |
| 64 | C | 0.117  | 3.765  | -0.498 |
| 65 | H | -0.817 | 3.177  | -0.564 |
| 66 | C | 0.334  | 4.511  | -1.831 |
| 67 | H | 1.126  | 5.275  | -1.743 |
| 68 | H | -0.592 | 5.044  | -2.105 |
| 69 | H | 0.592  | 3.843  | -2.670 |
| 70 | C | -0.074 | 4.810  | 0.640  |
| 71 | H | -0.307 | 4.342  | 1.611  |
| 72 | H | -0.907 | 5.485  | 0.381  |
| 73 | H | 0.836  | 5.422  | 0.765  |
| 74 | C | 2.033  | 0.593  | 3.012  |
| 75 | H | 1.080  | 0.030  | 2.976  |
| 76 | C | 3.168  | -0.382 | 3.386  |
| 77 | H | 3.370  | -1.129 | 2.600  |

---



|    |   |       |        |        |
|----|---|-------|--------|--------|
| 78 | H | 2.892 | -0.927 | 4.305  |
| 79 | H | 4.110 | 0.150  | 3.605  |
| 80 | C | 1.905 | 1.670  | 4.128  |
| 81 | H | 2.847 | 2.237  | 4.229  |
| 82 | H | 1.696 | 1.181  | 5.095  |
| 83 | H | 1.100 | 2.398  | 3.931  |
| 84 | H | 2.847 | 0.682  | -1.453 |
| 85 | H | 0.684 | -2.720 | 0.383  |

**Table S13** The atomic coordinate of optimized species of complex **7**

| Tag | Atomic symbol | X      | Y      | Z      |
|-----|---------------|--------|--------|--------|
| 1   | Fe            | 0.181  | -0.362 | -1.255 |
| 2   | S             | 1.165  | -1.985 | -0.006 |
| 3   | O             | -1.783 | -2.297 | -2.143 |
| 4   | O             | -0.895 | 1.680  | -3.047 |
| 5   | N             | 1.731  | -0.452 | -2.281 |
| 6   | H             | 1.852  | 0.076  | -3.153 |
| 7   | N             | -1.845 | 0.436  | 0.832  |
| 8   | N             | 0.179  | 1.226  | 1.205  |
| 9   | C             | -1.052 | -1.498 | -1.688 |
| 10  | C             | -0.465 | 0.891  | -2.288 |
| 11  | C             | 2.599  | -2.239 | -0.973 |
| 12  | C             | 3.581  | -3.222 | -0.715 |
| 13  | H             | 3.458  | -3.895 | 0.142  |
| 14  | C             | 4.695  | -3.330 | -1.552 |
| 15  | H             | 5.458  | -4.089 | -1.347 |
| 16  | C             | 4.840  | -2.469 | -2.667 |
| 17  | H             | 5.714  | -2.566 | -3.320 |
| 18  | C             | 3.872  | -1.505 | -2.946 |
| 19  | H             | 3.977  | -0.840 | -3.813 |
| 20  | C             | 2.738  | -1.371 | -2.098 |
| 21  | C             | -2.781 | -2.443 | 3.249  |
| 22  | H             | -3.065 | -1.455 | 3.653  |
| 23  | H             | -2.047 | -2.899 | 3.939  |
| 24  | H             | -3.689 | -3.074 | 3.259  |
| 25  | C             | -2.193 | -2.347 | 1.820  |
| 26  | H             | -1.272 | -1.739 | 1.864  |
| 27  | C             | -1.786 | -3.752 | 1.321  |
| 28  | H             | -2.643 | -4.451 | 1.328  |
| 29  | H             | -1.007 | -4.173 | 1.981  |

---

|    |   |        |        |        |
|----|---|--------|--------|--------|
| 30 | H | -1.378 | -3.713 | 0.299  |
| 31 | C | -3.177 | -1.654 | 0.875  |
| 32 | C | -4.351 | -2.334 | 0.498  |
| 33 | H | -4.516 | -3.354 | 0.861  |
| 34 | C | -5.307 | -1.735 | -0.329 |
| 35 | H | -6.211 | -2.285 | -0.612 |
| 36 | C | -5.107 | -0.430 | -0.791 |
| 37 | H | -5.864 | 0.038  | -1.430 |
| 38 | C | -3.953 | 0.301  | -0.445 |
| 39 | C | -2.982 | -0.335 | 0.379  |
| 40 | C | -3.817 | 1.748  | -0.921 |
| 41 | H | -2.774 | 2.064  | -0.745 |
| 42 | C | -4.107 | 1.910  | -2.430 |
| 43 | H | -3.489 | 1.231  | -3.038 |
| 44 | H | -3.888 | 2.945  | -2.747 |
| 45 | H | -5.169 | 1.712  | -2.664 |
| 46 | C | -4.745 | 2.683  | -0.105 |
| 47 | H | -5.806 | 2.417  | -0.265 |
| 48 | H | -4.608 | 3.734  | -0.418 |
| 49 | H | -4.550 | 2.621  | 0.980  |
| 50 | C | -1.971 | 1.136  | 2.136  |
| 51 | H | -2.048 | 0.392  | 2.952  |
| 52 | C | -0.669 | 1.937  | 2.196  |
| 53 | H | -0.197 | 1.928  | 3.191  |
| 54 | C | -0.559 | 0.436  | 0.359  |
| 55 | C | 1.583  | 1.577  | 1.144  |
| 56 | C | 2.483  | 0.941  | 2.047  |
| 57 | C | 3.829  | 1.352  | 2.040  |
| 58 | H | 4.538  | 0.865  | 2.719  |
| 59 | C | 4.278  | 2.369  | 1.191  |
| 60 | H | 5.332  | 2.670  | 1.202  |
| 61 | C | 3.372  | 3.011  | 0.341  |
| 62 | H | 3.722  | 3.824  | -0.304 |
| 63 | C | 2.013  | 2.642  | 0.305  |
| 64 | C | 1.060  | 3.445  | -0.581 |
| 65 | H | 0.100  | 2.901  | -0.630 |
| 66 | C | 1.583  | 3.592  | -2.026 |
| 67 | H | 2.480  | 4.237  | -2.070 |
| 68 | H | 0.811  | 4.051  | -2.668 |
| 69 | H | 1.849  | 2.610  | -2.452 |
| 70 | C | 0.787  | 4.841  | 0.031  |

---

|    |   |        |        |        |
|----|---|--------|--------|--------|
| 71 | H | 0.375  | 4.770  | 1.054  |
| 72 | H | 0.067  | 5.403  | -0.591 |
| 73 | H | 1.718  | 5.434  | 0.092  |
| 74 | C | 2.041  | -0.113 | 3.065  |
| 75 | H | 1.028  | -0.450 | 2.781  |
| 76 | C | 2.957  | -1.356 | 3.077  |
| 77 | H | 3.057  | -1.785 | 2.068  |
| 78 | H | 2.532  | -2.130 | 3.743  |
| 79 | H | 3.967  | -1.115 | 3.457  |
| 80 | C | 1.976  | 0.496  | 4.489  |
| 81 | H | 2.981  | 0.813  | 4.824  |
| 82 | H | 1.599  | -0.251 | 5.212  |
| 83 | H | 1.321  | 1.384  | 4.543  |
| 84 | H | -0.804 | 2.990  | 1.883  |
| 85 | H | -2.874 | 1.767  | 2.153  |

**Table S14** The atomic coordinate of optimized species of complex **7-NH<sup>+</sup>**

| Tag | Atomic symbol | X      | Y      | Z      |
|-----|---------------|--------|--------|--------|
| 1   | Fe            | 0.598  | -0.265 | -0.926 |
| 2   | S             | 1.043  | -1.932 | 0.485  |
| 3   | O             | -1.108 | -2.091 | -2.368 |
| 4   | O             | 0.175  | 1.822  | -2.944 |
| 5   | N             | 2.353  | -0.769 | -1.830 |
| 6   | H             | 2.378  | -0.604 | -2.847 |
| 7   | N             | -1.786 | 0.167  | 0.913  |
| 8   | N             | -0.068 | 1.546  | 1.133  |
| 9   | C             | -0.466 | -1.339 | -1.749 |
| 10  | C             | 0.335  | 1.056  | -2.079 |
| 11  | C             | 2.382  | -2.719 | -0.373 |
| 12  | C             | 2.909  | -3.967 | 0.024  |
| 13  | H             | 2.504  | -4.470 | 0.907  |
| 14  | C             | 3.928  | -4.559 | -0.733 |
| 15  | H             | 4.326  | -5.534 | -0.431 |
| 16  | C             | 4.429  | -3.926 | -1.886 |
| 17  | H             | 5.214  | -4.404 | -2.480 |
| 18  | C             | 3.922  | -2.678 | -2.280 |
| 19  | H             | 4.315  | -2.173 | -3.171 |
| 20  | C             | 2.913  | -2.083 | -1.512 |
| 21  | C             | -3.180 | -2.289 | 3.526  |
| 22  | H             | -3.611 | -1.277 | 3.637  |

---

|    |   |        |        |        |
|----|---|--------|--------|--------|
| 23 | H | -2.630 | -2.531 | 4.453  |
| 24 | H | -4.025 | -2.994 | 3.441  |
| 25 | C | -2.245 | -2.401 | 2.296  |
| 26 | H | -1.399 | -1.703 | 2.442  |
| 27 | C | -1.659 | -3.828 | 2.209  |
| 28 | H | -2.455 | -4.591 | 2.150  |
| 29 | H | -1.064 | -4.046 | 3.113  |
| 30 | H | -1.006 | -3.943 | 1.328  |
| 31 | C | -2.984 | -1.989 | 1.021  |
| 32 | C | -3.980 | -2.838 | 0.500  |
| 33 | H | -4.171 | -3.800 | 0.988  |
| 34 | C | -4.735 | -2.474 | -0.620 |
| 35 | H | -5.504 | -3.151 | -1.007 |
| 36 | C | -4.519 | -1.236 | -1.235 |
| 37 | H | -5.132 | -0.950 | -2.097 |
| 38 | C | -3.540 | -0.341 | -0.762 |
| 39 | C | -2.759 | -0.752 | 0.356  |
| 40 | C | -3.409 | 1.033  | -1.423 |
| 41 | H | -2.488 | 1.516  | -1.045 |
| 42 | C | -3.287 | 0.945  | -2.961 |
| 43 | H | -2.478 | 0.263  | -3.273 |
| 44 | H | -3.082 | 1.944  | -3.385 |
| 45 | H | -4.223 | 0.582  | -3.421 |
| 46 | C | -4.607 | 1.937  | -1.038 |
| 47 | H | -5.555 | 1.513  | -1.416 |
| 48 | H | -4.489 | 2.944  | -1.478 |
| 49 | H | -4.711 | 2.049  | 0.056  |
| 50 | C | -2.218 | 1.124  | 1.974  |
| 51 | H | -2.642 | 0.577  | 2.829  |
| 52 | C | -0.913 | 1.865  | 2.314  |
| 53 | H | -0.435 | 1.474  | 3.230  |
| 54 | C | -0.573 | 0.501  | 0.418  |
| 55 | C | 1.167  | 2.222  | 0.787  |
| 56 | C | 2.418  | 1.696  | 1.237  |
| 57 | C | 3.594  | 2.295  | 0.735  |
| 58 | H | 4.568  | 1.905  | 1.047  |
| 59 | C | 3.539  | 3.414  | -0.105 |
| 60 | H | 4.466  | 3.866  | -0.476 |
| 61 | C | 2.304  | 3.996  | -0.418 |
| 62 | H | 2.277  | 4.911  | -1.019 |
| 63 | C | 1.094  | 3.430  | 0.026  |

---

|    |   |        |        |        |
|----|---|--------|--------|--------|
| 64 | C | -0.224 | 4.173  | -0.212 |
| 65 | H | -1.051 | 3.445  | -0.101 |
| 66 | C | -0.354 | 4.822  | -1.607 |
| 67 | H | 0.363  | 5.651  | -1.740 |
| 68 | H | -1.364 | 5.254  | -1.719 |
| 69 | H | -0.199 | 4.098  | -2.422 |
| 70 | C | -0.393 | 5.270  | 0.874  |
| 71 | H | -0.311 | 4.871  | 1.900  |
| 72 | H | -1.376 | 5.764  | 0.772  |
| 73 | H | 0.388  | 6.043  | 0.763  |
| 74 | C | 2.511  | 0.663  | 2.361  |
| 75 | H | 1.601  | 0.037  | 2.331  |
| 76 | C | 3.727  | -0.278 | 2.259  |
| 77 | H | 3.785  | -0.782 | 1.279  |
| 78 | H | 3.656  | -1.061 | 3.034  |
| 79 | H | 4.679  | 0.257  | 2.429  |
| 80 | C | 2.545  | 1.404  | 3.725  |
| 81 | H | 3.458  | 2.021  | 3.812  |
| 82 | H | 2.548  | 0.674  | 4.555  |
| 83 | H | 1.680  | 2.076  | 3.860  |
| 84 | H | -1.047 | 2.952  | 2.420  |
| 85 | H | -2.997 | 1.792  | 1.561  |
| 86 | H | 2.945  | -0.027 | -1.407 |

**Table S15** The atomic coordinate of optimized species of complex **7-SH<sup>+</sup>**

| Tag | Atomic symbol | X      | Y      | Z      |
|-----|---------------|--------|--------|--------|
| 1   | Fe            | 0.214  | -0.315 | -1.233 |
| 2   | S             | 1.315  | -1.943 | 0.012  |
| 3   | O             | -1.747 | -2.205 | -2.227 |
| 4   | O             | -0.966 | 1.755  | -2.913 |
| 5   | N             | 1.759  | -0.320 | -2.229 |
| 6   | H             | 1.877  | 0.267  | -3.064 |
| 7   | N             | -1.909 | 0.428  | 0.801  |
| 8   | N             | 0.113  | 1.211  | 1.241  |
| 9   | C             | -1.049 | -1.422 | -1.713 |
| 10  | C             | -0.488 | 0.958  | -2.210 |
| 11  | C             | 2.762  | -2.148 | -1.035 |
| 12  | C             | 3.768  | -3.094 | -0.815 |

---

|    |   |        |        |        |
|----|---|--------|--------|--------|
| 13 | H | 3.697  | -3.806 | 0.013  |
| 14 | C | 4.874  | -3.112 | -1.683 |
| 15 | H | 5.668  | -3.849 | -1.531 |
| 16 | C | 4.962  | -2.179 | -2.735 |
| 17 | H | 5.829  | -2.196 | -3.402 |
| 18 | C | 3.955  | -1.231 | -2.942 |
| 19 | H | 4.029  | -0.510 | -3.765 |
| 20 | C | 2.824  | -1.205 | -2.089 |
| 21 | C | -2.740 | -2.509 | 3.156  |
| 22 | H | -3.037 | -1.529 | 3.569  |
| 23 | H | -2.002 | -2.961 | 3.842  |
| 24 | H | -3.640 | -3.150 | 3.157  |
| 25 | C | -2.157 | -2.388 | 1.726  |
| 26 | H | -1.251 | -1.753 | 1.784  |
| 27 | C | -1.720 | -3.786 | 1.227  |
| 28 | H | -2.543 | -4.519 | 1.300  |
| 29 | H | -0.890 | -4.172 | 1.845  |
| 30 | H | -1.404 | -3.768 | 0.168  |
| 31 | C | -3.154 | -1.716 | 0.780  |
| 32 | C | -4.290 | -2.437 | 0.366  |
| 33 | H | -4.418 | -3.472 | 0.701  |
| 34 | C | -5.261 | -1.857 | -0.457 |
| 35 | H | -6.136 | -2.438 | -0.765 |
| 36 | C | -5.120 | -0.529 | -0.873 |
| 37 | H | -5.894 | -0.078 | -1.502 |
| 38 | C | -4.008 | 0.246  | -0.490 |
| 39 | C | -3.015 | -0.374 | 0.320  |
| 40 | C | -3.946 | 1.716  | -0.908 |
| 41 | H | -2.927 | 2.089  | -0.694 |
| 42 | C | -4.216 | 1.919  | -2.417 |
| 43 | H | -3.563 | 1.289  | -3.042 |
| 44 | H | -4.041 | 2.974  | -2.693 |
| 45 | H | -5.263 | 1.684  | -2.677 |
| 46 | C | -4.947 | 2.562  | -0.080 |
| 47 | H | -5.986 | 2.248  | -0.285 |
| 48 | H | -4.859 | 3.631  | -0.342 |
| 49 | H | -4.784 | 2.461  | 1.008  |
| 50 | C | -2.079 | 1.147  | 2.096  |
| 51 | H | -2.233 | 0.409  | 2.905  |
| 52 | C | -0.755 | 1.908  | 2.231  |
| 53 | H | -0.318 | 1.847  | 3.238  |

---

|    |   |        |        |        |
|----|---|--------|--------|--------|
| 54 | C | -0.616 | 0.443  | 0.382  |
| 55 | C | 1.530  | 1.520  | 1.178  |
| 56 | C | 2.415  | 0.838  | 2.068  |
| 57 | C | 3.784  | 1.165  | 2.008  |
| 58 | H | 4.485  | 0.651  | 2.674  |
| 59 | C | 4.262  | 2.147  | 1.135  |
| 60 | H | 5.331  | 2.385  | 1.109  |
| 61 | C | 3.368  | 2.851  | 0.321  |
| 62 | H | 3.745  | 3.651  | -0.324 |
| 63 | C | 1.988  | 2.570  | 0.332  |
| 64 | C | 1.047  | 3.467  | -0.473 |
| 65 | H | 0.056  | 2.978  | -0.520 |
| 66 | C | 1.529  | 3.699  | -1.923 |
| 67 | H | 2.440  | 4.321  | -1.954 |
| 68 | H | 0.753  | 4.226  | -2.504 |
| 69 | H | 1.757  | 2.747  | -2.433 |
| 70 | C | 0.863  | 4.830  | 0.242  |
| 71 | H | 0.488  | 4.711  | 1.274  |
| 72 | H | 0.148  | 5.464  | -0.313 |
| 73 | H | 1.823  | 5.374  | 0.301  |
| 74 | C | 1.933  | -0.138 | 3.145  |
| 75 | H | 0.908  | -0.461 | 2.882  |
| 76 | C | 2.810  | -1.405 | 3.273  |
| 77 | H | 2.946  | -1.914 | 2.305  |
| 78 | H | 2.342  | -2.117 | 3.975  |
| 79 | H | 3.811  | -1.167 | 3.674  |
| 80 | C | 1.881  | 0.570  | 4.525  |
| 81 | H | 2.897  | 0.861  | 4.846  |
| 82 | H | 1.464  | -0.108 | 5.292  |
| 83 | H | 1.271  | 1.490  | 4.511  |
| 84 | H | -0.844 | 2.974  | 1.950  |
| 85 | H | -2.959 | 1.807  | 2.054  |
| 86 | H | 0.656  | -3.096 | -0.311 |

**Table S16** The atomic coordinate of optimized species of complex **7-NH<sup>+</sup>-SH<sup>+</sup>**

| Tag | Atomic symbol | X      | Y      | Z      |
|-----|---------------|--------|--------|--------|
| 1   | Fe            | 0.515  | -0.039 | -0.877 |
| 2   | S             | 1.489  | -1.650 | 0.528  |
| 3   | O             | -0.894 | -2.210 | -2.190 |
| 4   | O             | -0.711 | 1.629  | -2.940 |

---

|    |   |        |        |        |
|----|---|--------|--------|--------|
| 5  | N | 2.290  | -0.189 | -1.888 |
| 6  | H | 2.186  | -0.006 | -2.898 |
| 7  | N | -2.011 | 0.192  | 0.881  |
| 8  | N | -0.176 | 1.384  | 1.262  |
| 9  | C | -0.357 | -1.341 | -1.638 |
| 10 | C | -0.210 | 1.044  | -2.072 |
| 11 | C | 2.800  | -2.217 | -0.581 |
| 12 | C | 3.548  | -3.376 | -0.317 |
| 13 | H | 3.339  | -3.989 | 0.566  |
| 14 | C | 4.557  | -3.749 | -1.219 |
| 15 | H | 5.132  | -4.662 | -1.036 |
| 16 | C | 4.823  | -2.962 | -2.353 |
| 17 | H | 5.608  | -3.260 | -3.055 |
| 18 | C | 4.090  | -1.789 | -2.595 |
| 19 | H | 4.307  | -1.173 | -3.475 |
| 20 | C | 3.076  | -1.416 | -1.700 |
| 21 | C | -2.755 | -2.810 | 3.179  |
| 22 | H | -3.234 | -1.878 | 3.527  |
| 23 | H | -2.052 | -3.149 | 3.960  |
| 24 | H | -3.550 | -3.570 | 3.085  |
| 25 | C | -2.021 | -2.614 | 1.828  |
| 26 | H | -1.228 | -1.856 | 1.990  |
| 27 | C | -1.337 | -3.936 | 1.409  |
| 28 | H | -2.055 | -4.774 | 1.370  |
| 29 | H | -0.556 | -4.220 | 2.137  |
| 30 | H | -0.890 | -3.878 | 0.394  |
| 31 | C | -2.977 | -2.084 | 0.758  |
| 32 | C | -3.952 | -2.944 | 0.218  |
| 33 | H | -3.988 | -3.989 | 0.542  |
| 34 | C | -4.892 | -2.484 | -0.713 |
| 35 | H | -5.644 | -3.170 | -1.114 |
| 36 | C | -4.882 | -1.144 | -1.117 |
| 37 | H | -5.636 | -0.794 | -1.829 |
| 38 | C | -3.934 | -0.232 | -0.615 |
| 39 | C | -2.971 | -0.734 | 0.306  |
| 40 | C | -4.020 | 1.240  | -1.024 |
| 41 | H | -3.091 | 1.746  | -0.691 |
| 42 | C | -4.131 | 1.430  | -2.554 |
| 43 | H | -3.327 | 0.907  | -3.099 |
| 44 | H | -4.079 | 2.503  | -2.807 |
| 45 | H | -5.094 | 1.055  | -2.941 |

---



---

|    |   |        |        |        |
|----|---|--------|--------|--------|
| 46 | C | -5.215 | 1.931  | -0.318 |
| 47 | H | -6.171 | 1.486  | -0.646 |
| 48 | H | -5.242 | 3.006  | -0.567 |
| 49 | H | -5.172 | 1.831  | 0.781  |
| 50 | C | -2.348 | 0.996  | 2.102  |
| 51 | H | -2.577 | 0.309  | 2.934  |
| 52 | C | -1.075 | 1.850  | 2.359  |
| 53 | H | -0.625 | 1.651  | 3.344  |
| 54 | C | -0.771 | 0.461  | 0.471  |
| 55 | C | 1.165  | 1.782  | 0.861  |
| 56 | C | 2.309  | 1.277  | 1.584  |
| 57 | C | 3.581  | 1.557  | 1.055  |
| 58 | H | 4.469  | 1.165  | 1.559  |
| 59 | C | 3.740  | 2.375  | -0.081 |
| 60 | H | 4.746  | 2.585  | -0.460 |
| 61 | C | 2.631  | 3.007  | -0.662 |
| 62 | H | 2.784  | 3.739  | -1.460 |
| 63 | C | 1.323  | 2.785  | -0.171 |
| 64 | C | 0.199  | 3.760  | -0.533 |
| 65 | H | -0.767 | 3.222  | -0.508 |
| 66 | C | 0.352  | 4.457  | -1.902 |
| 67 | H | 1.181  | 5.186  | -1.892 |
| 68 | H | -0.566 | 5.026  | -2.124 |
| 69 | H | 0.519  | 3.758  | -2.737 |
| 70 | C | 0.159  | 4.857  | 0.574  |
| 71 | H | 0.044  | 4.442  | 1.589  |
| 72 | H | -0.684 | 5.542  | 0.383  |
| 73 | H | 1.089  | 5.452  | 0.562  |
| 74 | C | 2.165  | 0.610  | 2.950  |
| 75 | H | 1.193  | 0.081  | 2.975  |
| 76 | C | 3.278  | -0.397 | 3.308  |
| 77 | H | 3.413  | -1.180 | 2.543  |
| 78 | H | 3.027  | -0.896 | 4.260  |
| 79 | H | 4.250  | 0.105  | 3.461  |
| 80 | C | 2.135  | 1.730  | 4.032  |
| 81 | H | 3.111  | 2.242  | 4.083  |
| 82 | H | 1.933  | 1.287  | 5.022  |
| 83 | H | 1.370  | 2.501  | 3.834  |
| 84 | H | -1.267 | 2.931  | 2.268  |
| 85 | H | -3.240 | 1.608  | 1.898  |
| 86 | H | 2.816  | 0.630  | -1.510 |

---

---

|    |   |       |        |       |
|----|---|-------|--------|-------|
| 87 | H | 0.640 | -2.722 | 0.418 |
|----|---|-------|--------|-------|

---
